# Supplementary material for: Synergistic improvement to dimensional stability of Populus cathay ana via hemicellulose removal/alkali lignin impregnation
Source: publisher site journal article supplement (doi:10.1515/hf-2022-0147), 2023-04-24
Supplement: Supplementary file 1 [file j_hf-2022-0147_suppl_001.docx]

**Supplementary Material**

**Synergistic improvement to dimensional stability of *Populus cathayana* via hemicellulose removal/alkali lignin impregnation**

Meng Yang et al.

DOI 10.1515/hf-2022-0147

**
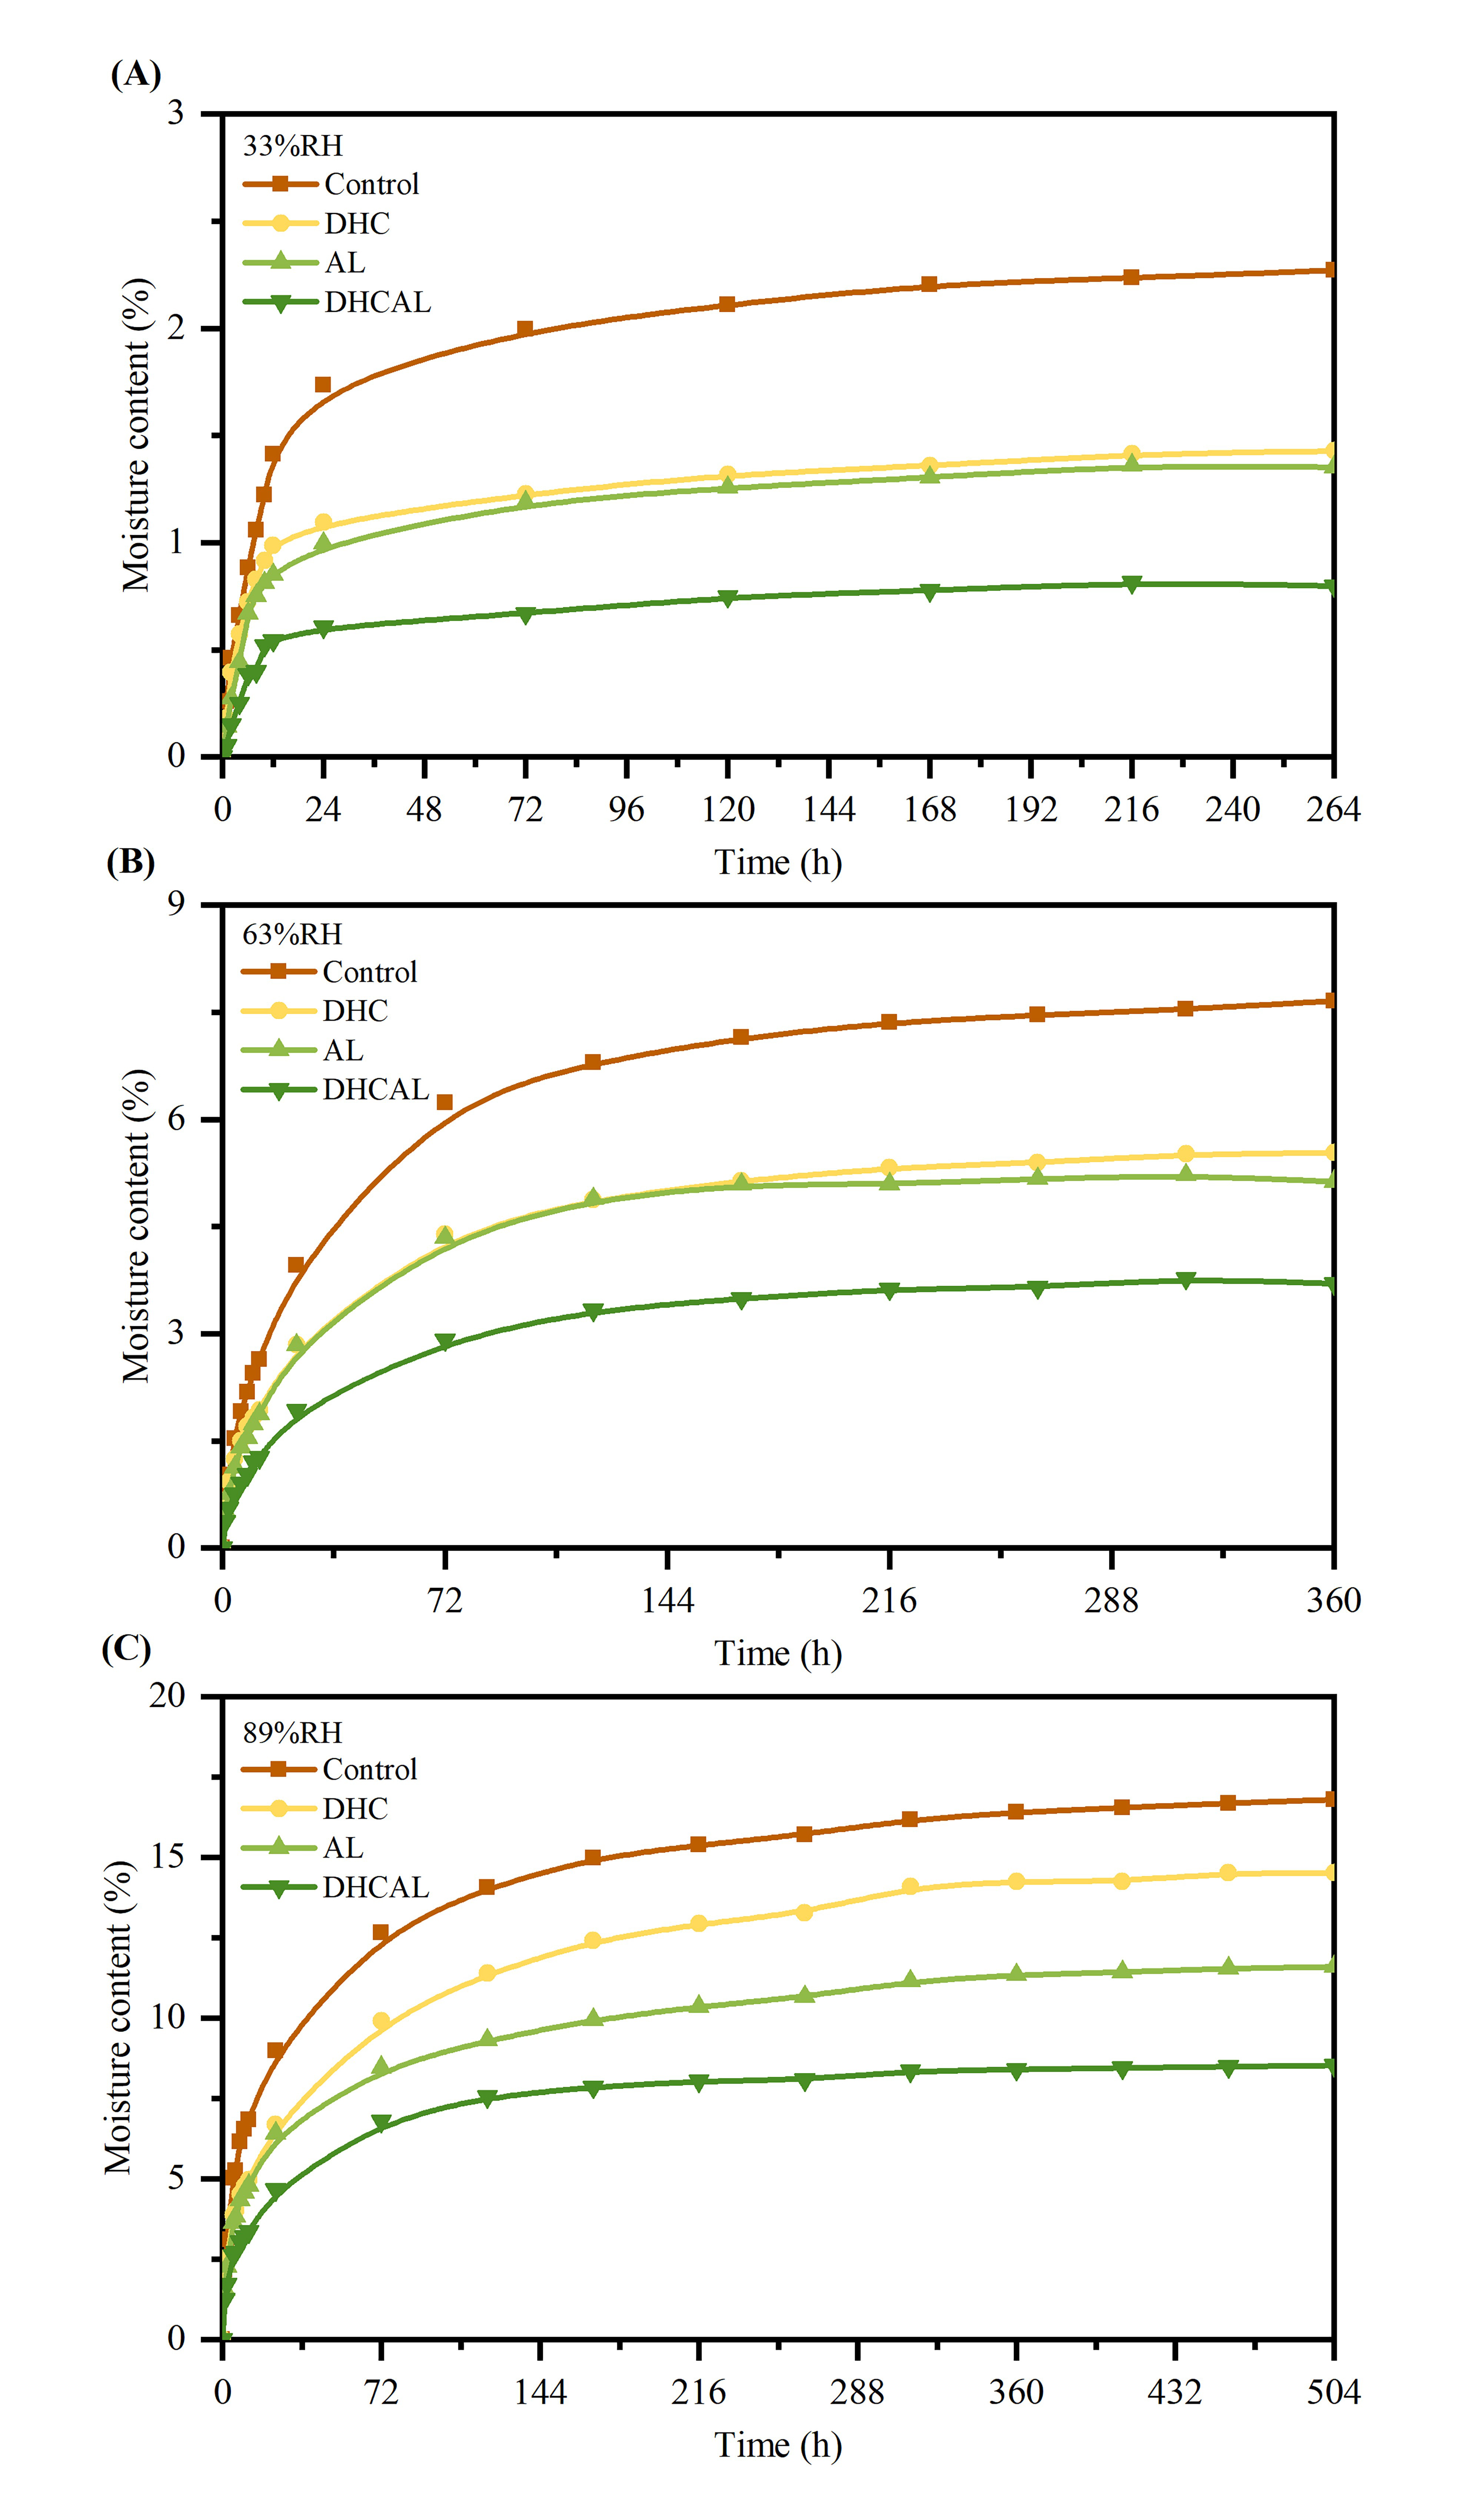
**

**Supplementary Figure S1:** Moisture adsorption processes under different RH conditions (25℃).


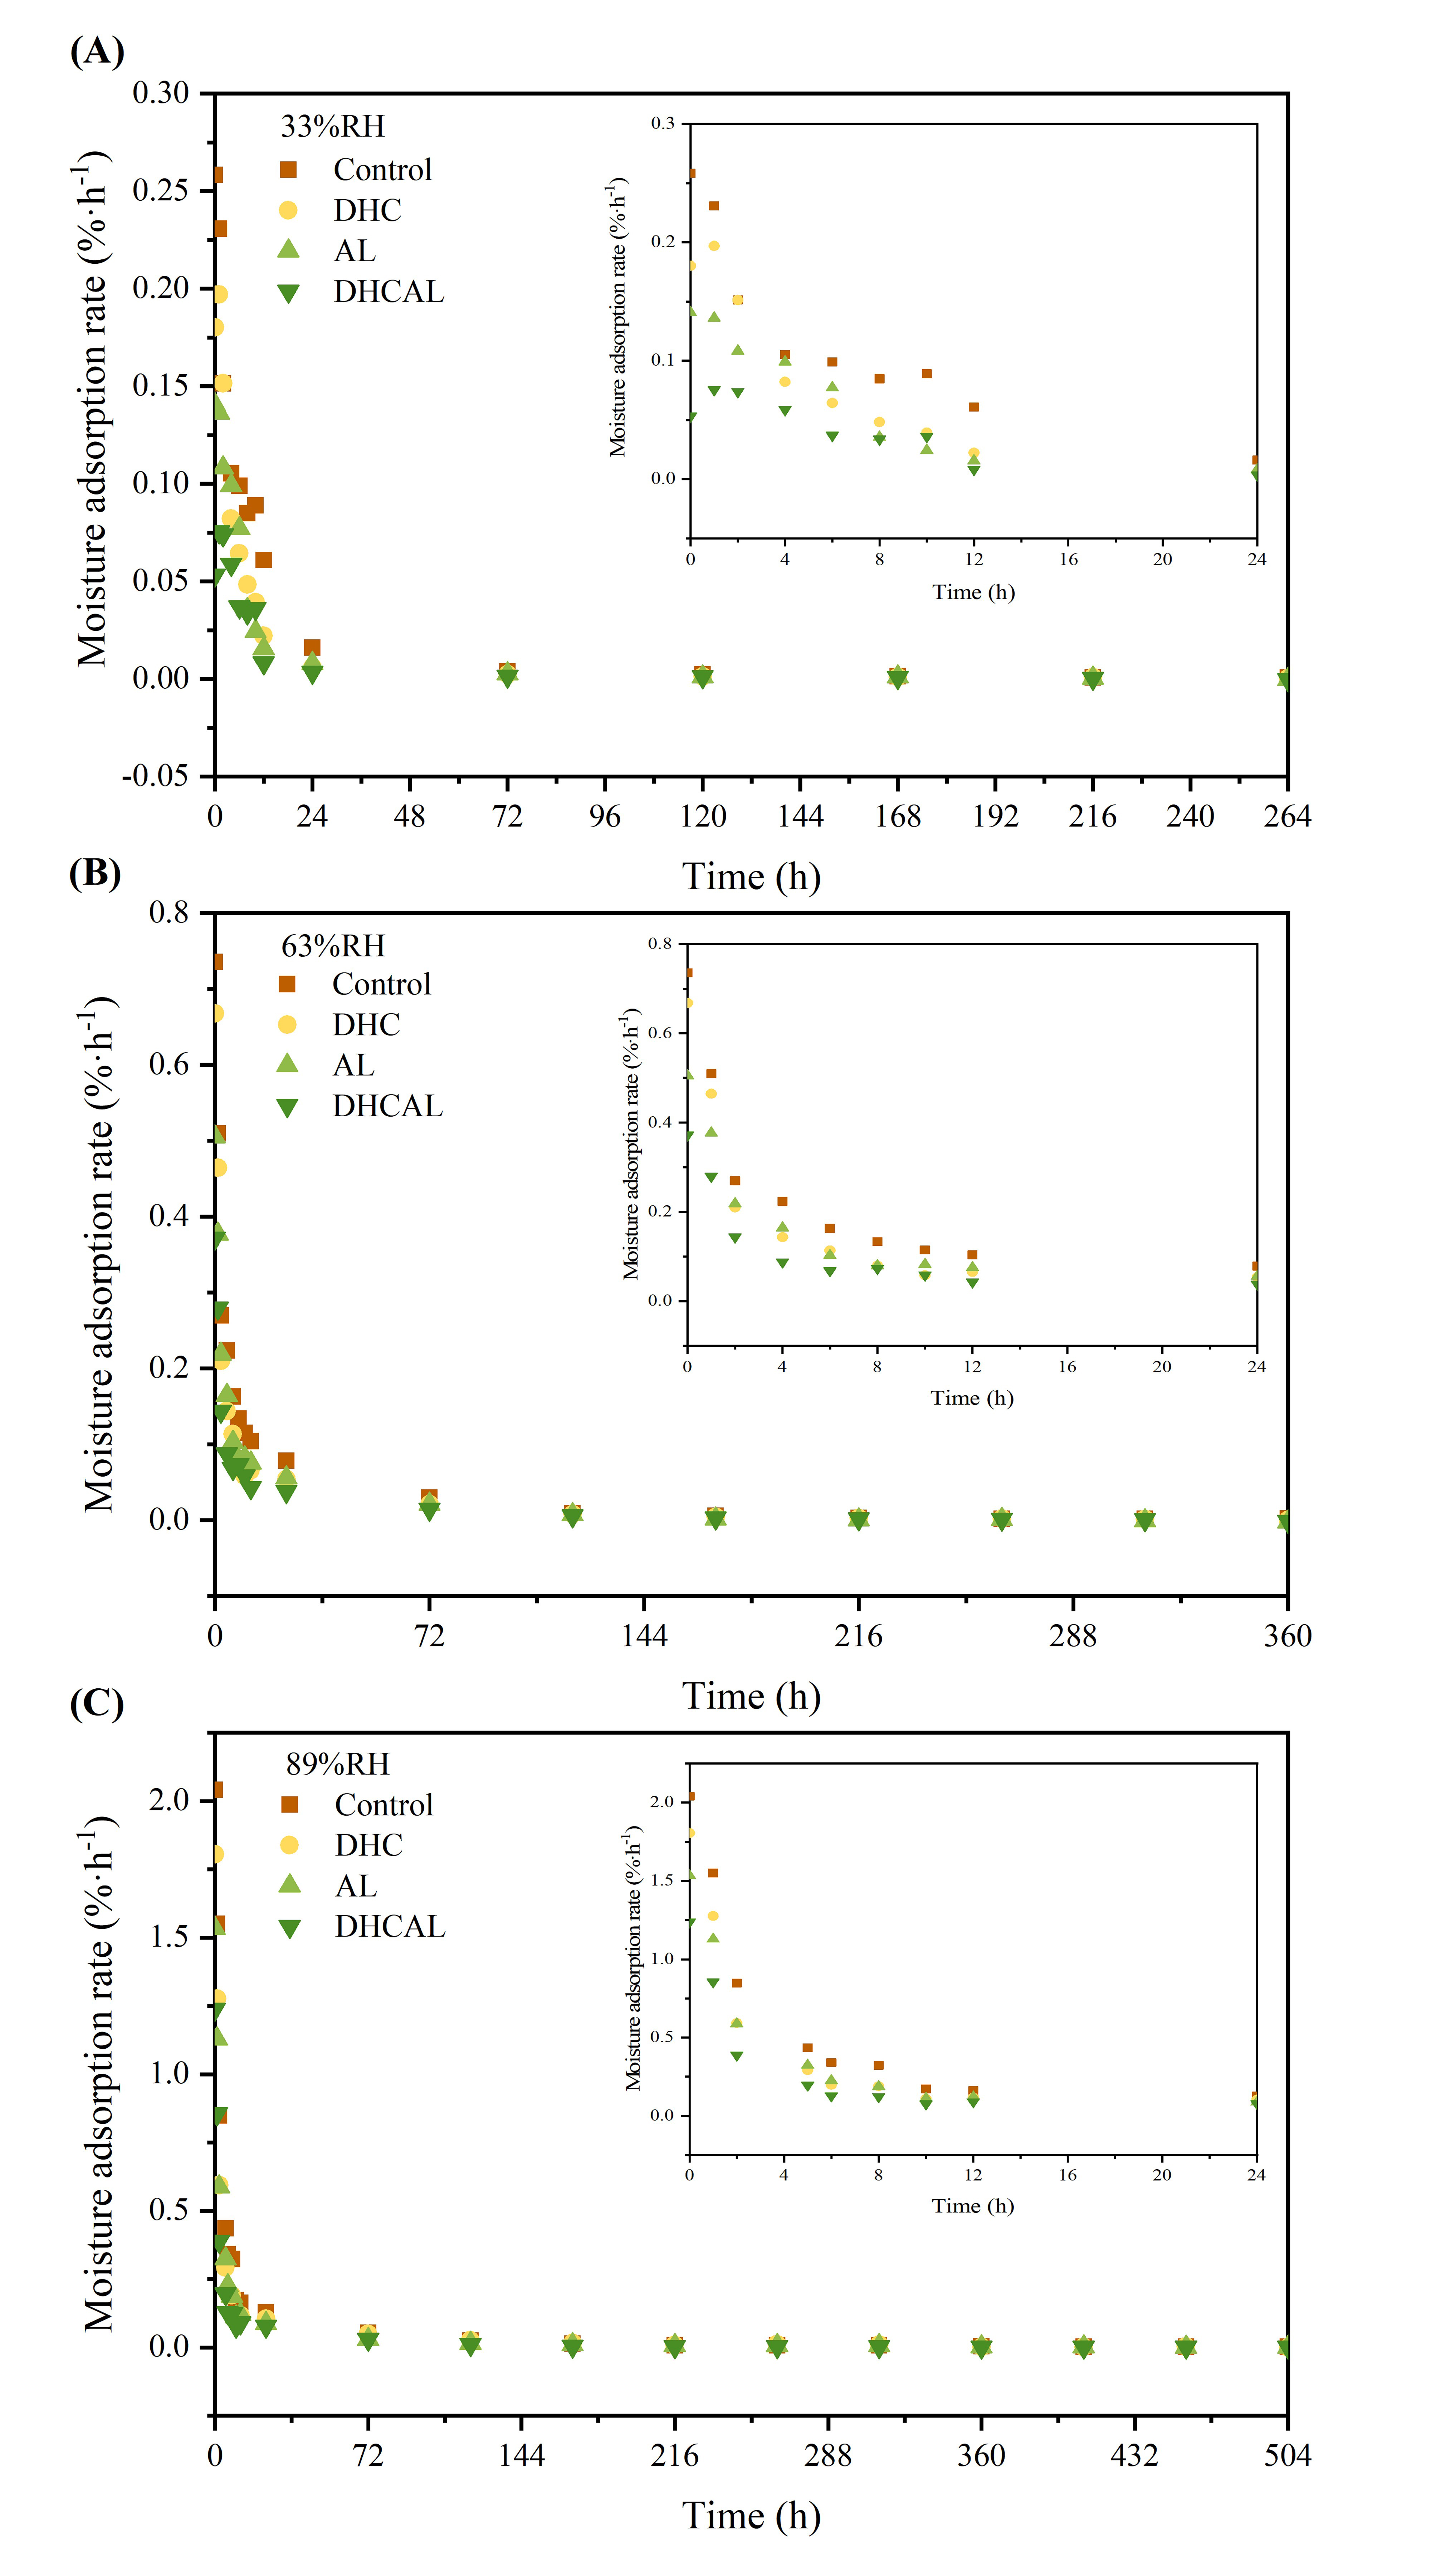


**Supplementary Figure S2:** Moisture adsorption rates under different RH conditions (25℃).
